# Supplementary material for: Statistical study of the causes of acacia tree deterioration in the Ha’il region
Source: PeerJ. 2025 Dec 17;13:e20067. doi: 10.7717/peerj.20067 (PMC12717848; doi:10.7717/peerj.20067)
Supplement: Supplemental Information 1 [file peerj-13-20067-s001.xlsx]

## Sheet: Sheet1
Age	Educational level	The area where you live	gender	The extent of the impact of drought and lack of rain	Impact of climate change (such as rising temperatures)	Impact of desertification	Impact of sandstorms	Effect of soil erosion	Impact of flash floods	The effect of high salinity in soil and water	Impact of low quality of water used for irrigation	The effect of overcutting	Effect of overgrazing	Impact of urban expansion	The impact of agricultural expansion	Impact of industrial activities (such as factories and major projects),	Impact of mining and exploitation of natural resources	The impact of unregulated ecotourism	The impact of the use of heavy equipment on the surrounding areas	Impact of air pollution due to human activities and overhunting birds that feed on insects and worms		What is the percentage of decline of acacia trees in the Hail region based on the factors mentioned above
34-44	Postgraduate qualification	Hail city	Male	5	4	4	3	3	5	4	3	5	4	4	4	4	3	3	3	3		75	Imposing strict laws on illegal cutting
34-44	Postgraduate qualification	Hail city	Male	4	4	4	4	5	4	5	5	4	4	3	3	4	4	3	4	3		70	Confronting desertification through government programs
34-44	University qualification	A governorate of Hail	Male	4	4	4	4	1	1	1	2	4	1	4	3	1	2	2	1	2		60	Planting more acacia treesEducating the community about the importance of acacia treesConfronting desertification through government programs
34-44	University qualification	Hail city	Male	5	5	5	5	5	1	3	4	5	5	4	5	5	5	5	5	5		40	Organizing grazing
34-44	Postgraduate qualification	Hail city	Female	5	5	5	5	5	5	5	5	5	5	5	1	5	5	1	2	4		90	Improving irrigation techniques;Imposing strict laws on illegal cuttingOrganizing grazingExpansion of protected areasConfronting desertification through government programs
34-44	University qualification	Hail city	Male	4	5	5	5	3	3	3	4	5	5	5	5	5	4	3	3	3		50	Imposing strict laws on illegal cutting
18-22	University qualification	Hail city	Male	5	2	3	4	5	5	5	5	4	4	3	1	4	3	5	5	2		67	Improving irrigation techniques;Imposing strict laws on illegal cuttingPlanting more acacia treesEducating the community about the importance of acacia trees
more than 45	High school qualification	A governorate of Hail	Male	4	4	4	5	4	5	5	5	5	5	5	5	5	5	5	5	5		100	Improving irrigation techniques;
34-44	Postgraduate qualification	Hail city	Male	5	5	5	5	4	5	4	4	5	5	5	4	5	5	5	5	5		50	Imposing strict laws on illegal cuttingPlanting more acacia treesOrganizing grazing
23-33	University qualification	Hail city	Male	3	3	3	3	3	3	2	2	5	5	2	3	3	3	5	5	3		50	Planting more acacia trees
34-44	Postgraduate qualification	A governorate of Hail	Male	5	5	3	2	3	3	3	3	4	3	2	3	2	3	2	3	3		60	Organizing grazing
34-44	University qualification	Hail city	Male	3	4	3	3	3	2	2	2	5	4	5	5	5	5	4	5	3		47	Imposing strict laws on illegal cutting
more than 45	Postgraduate qualification	Hail city	Male	5	5	5	5	5	3	5	5	5	5	5	5	5	5	4	4	5		50	Improving irrigation techniques;Imposing strict laws on illegal cuttingOrganizing grazingExpansion of protected areas
more than 45	Postgraduate qualification	Hail city	Female	2	2	2	3	3	3	3	3	4	4	4	3	4	4	3	4	4		20	Expansion of protected areasConfronting desertification through government programsImposing strict laws on illegal cuttingImproving irrigation techniques;Organizing grazing
18-22	University qualification	Villages from the villages of Hail	Female	4	5	5	5	5	5	5	5	5	5	5	5	5	5	5	5	5		100	Improving irrigation techniques;
more than 45	High school qualification	A governorate of Hail	Male	3	2	3	2	4	2	1	2	5	3	4	4	5	4	2	4	3		50	Imposing strict laws on illegal cuttingPlanting more acacia treesEducating the community about the importance of acacia trees
34-44	University qualification	A governorate of Hail	Male	5	5	5	4	4	2	2	1	5	5	5	4	4	4	2	3	3		80	Imposing strict laws on illegal cuttingOrganizing grazingExpansion of protected areasConfronting desertification through government programs
23-33	University qualification	Villages from the villages of Hail	Male	5	5	5	5	5	3	3	3	5	5	5	3	5	5	5	5	3		70	Planting more acacia treesOrganizing grazingConfronting desertification through government programsImposing strict laws on illegal cutting
more than 45	High school qualification	A governorate of Hail	Male	4	3	4	4	2	2	3	2	5	4	4	3	3	2	1	2	2		40	Imposing strict laws on illegal cuttingExpansion of protected areasEducating the community about the importance of acacia treesPlanting more acacia treesConfronting desertification through government programsOrganizing grazingImproving irrigation techniques;
23-33	Postgraduate qualification	Hail city	Female	3	3	3	3	3	3	3	3	4	4	4	4	4	4	4	4	4		50	Organizing grazing
34-44	University qualification	Hail city	Male	3	3	5	3	5	3	5	5	5	5	5	5	5	5	3	5	4		40	Improving irrigation techniques;Organizing grazingPlanting more acacia trees
more than 45	University qualification	Hail city	Male	4	5	3	5	4	3	4	4	4	5	3	3	4	4	4	5	5		35	Imposing strict laws on illegal cutting
34-44	University qualification	Hail city	Female	3	2	3	2	2	2	2	3	3	3	2	2	2	2	2	2	2		30	Imposing strict laws on illegal cutting
more than 45	Postgraduate qualification	Villages from the villages of Hail	Male	3	3	3	3	4	4	4	4	5	5	5	5	5	5	5	5	5		40	Imposing strict laws on illegal cuttingExpansion of protected areasPlanting more acacia trees
23-33	Postgraduate qualification	Hail city	Female	4	4	5	2	3	5	4	5	5	5	4	1	2	4	3	2	4		30	Improving irrigation techniques;Imposing strict laws on illegal cuttingOrganizing grazing
34-44	University qualification	Hail city	Female	5	3	3	3	2	4	4	2	4	4	5	2	4	3	5	5	4		50	Imposing strict laws on illegal cuttingPlanting more acacia treesConfronting desertification through government programs
more than 45	Postgraduate qualification	Hail city	Female	5	4	5	5	5	5	3	4	5	5	5	5	4	4	4	4	4		40	Improving irrigation techniques;Organizing grazingImposing strict laws on illegal cuttingExpansion of protected areasEducating the community about the importance of acacia trees
more than 45	Diploma qualification	Villages from the villages of Hail	Male	3	3	4	4	5	4	2	2	5	5	5	4	5	5	4	4	2		60	Imposing strict laws on illegal cuttingOrganizing grazingExpansion of protected areasConfronting desertification through government programs
18-22	University qualification	Hail city	Female	4	5	5	5	5	5	5	5	5	5	5	5	5	5	5	5	5		50	Organizing grazingExpansion of protected areasConfronting desertification through government programsImposing strict laws on illegal cutting
more than 45	High school qualification	A governorate of Hail	Male	3	4	5	5	5	3	1	4	5	5	4	4	5	5	4	5	3		70	Imposing strict laws on illegal cuttingOrganizing grazingEducating the community about the importance of acacia treesExpansion of protected areas
more than 45	Diploma qualification	A governorate of Hail	Male	4	3	4	4	3	3	2	4	5	2	3	3	2	2	3	4	4		50	Imposing strict laws on illegal cuttingImproving irrigation techniques;Expansion of protected areasPlanting more acacia treesOrganizing grazingEducating the community about the importance of acacia treesConfronting desertification through government programs
34-44	Postgraduate qualification	Hail city	Male	5	2	5	3	1	2	1	5	5	5	3	5	3	2	1	5	4		40	Imposing strict laws on illegal cuttingOrganizing grazingExpansion of protected areasPlanting more acacia trees
more than 45	University qualification	Hail city	Male	2	2	1	2	1	1	1	4	5	5	1	1	1	1	1	1	1		20	Improving irrigation techniques;Imposing strict laws on illegal cuttingExpansion of protected areas
more than 45	Diploma qualification	Villages from the villages of Hail	Male	3	4	4	4	4	4	4	4	5	5	5	5	5	5	5	5	5		30	Imposing strict laws on illegal cuttingPlanting more acacia treesExpansion of protected areasOrganizing grazing
34-44	Postgraduate qualification	A governorate of Hail	Male	5	5	5	5	5	5	5	5	5	5	5	5	5	5	5	5	5		70	Imposing strict laws on illegal cuttingPlanting more acacia treesEducating the community about the importance of acacia trees
18-22	University qualification	Hail city	Female	5	5	4	5	5	5	5	5	5	5	4	5	5	4	4	5	4		99	Expansion of protected areas
more than 45	High school qualification	A governorate of Hail	Male	3	1	1	1	4	4	1	1	5	3	3	3	3	3	3	5	2		25	Imposing strict laws on illegal cutting
34-44	Postgraduate qualification	Hail city	Female	5	4	3	3	3	5	4	3	5	5	5	5	5	5	5	5	5		40	Improving irrigation techniques;Imposing strict laws on illegal cuttingEducating the community about the importance of acacia trees
more than 45	High school qualification	A governorate of Hail	Male	5	5	5	5	5	2	3	3	5	5	5	4	5	3	3	4	4		100	Educating the community about the importance of acacia trees
more than 45	University qualification	A governorate of Hail	Male	3	3	4	2	4	4	4	4	5	5	4	4	2	3	2	3	2		60	Organizing grazingPlanting more acacia treesEducating the community about the importance of acacia trees
18-22	University qualification	Hail city	Female	1	2	5	1	5	4	5	3	5	4	3	1	5	1	1	3	5		80	Imposing strict laws on illegal cuttingEducating the community about the importance of acacia treesConfronting desertification through government programsPlanting more acacia treesExpansion of protected areasOrganizing grazing
more than 45	University qualification	A governorate of Hail	Male	5	3	5	4	3	2	2	2	5	5	2	2	3	2	3	3	3		55	Improving irrigation techniques;Imposing strict laws on illegal cuttingExpansion of protected areasConfronting desertification through government programsOrganizing grazing
more than 45	Diploma qualification	A governorate of Hail	Male	3	3	3	4	2	2	2	1	5	4	2	2	1	3	1	4	2		50	Imposing strict laws on illegal cuttingOrganizing grazingExpansion of protected areas
34-44	Postgraduate qualification	A governorate of Hail	Male	2	2	2	5	3	2	3	3	3	5	2	2	2	1	5	1	4		22	Expansion of protected areas
more than 45	University qualification	Villages from the villages of Hail	Male	2	2	3	2	3	2	2	2	5	5	4	4	4	3	4	4	3		70	Imposing strict laws on illegal cuttingOrganizing grazingExpansion of protected areas
34-44	High school qualification	A governorate of Hail	Male	5	1	3	2	5	3	1	2	5	3	2	2	2	1	3	3	2		50	Planting more acacia treesEducating the community about the importance of acacia treesImposing strict laws on illegal cutting
more than 45	High school qualification	A governorate of Hail	Male	3	3	4	3	2	3	3	2	3	3	4	3	3	3	3	4	4		30	Imposing strict laws on illegal cuttingOrganizing grazingConfronting desertification through government programs
34-44	Postgraduate qualification	A governorate of Hail	Male	3	3	3	3	3	4	3	1	5	1	5	5	5	4	2	5	3		60	Planting more acacia treesImposing strict laws on illegal cuttingConfronting desertification through government programs
more than 45	Diploma qualification	Hail city	Female	3	4	3	1	3	4	4	2	5	2	4	3	4	3	2	4	4		50	Imposing strict laws on illegal cuttingOrganizing grazingEducating the community about the importance of acacia trees
more than 45	High school qualification	Villages from the villages of Hail	Male	3	3	3	4	5	5	4	2	5	5	5	5	5	5	3	5	4		70	Imposing strict laws on illegal cuttingOrganizing grazingExpansion of protected areasConfronting desertification through government programs
more than 45	Postgraduate qualification	Hail city	Female	3	3	4	3	3	2	3	2	5	5	5	5	5	5	3	5	5		95	Organizing grazingImposing strict laws on illegal cuttingEducating the community about the importance of acacia trees
34-44	University qualification	Hail city	Male	3	2	3	2	5	3	3	3	5	5	5	5	5	5	4	5	5		40	Imposing strict laws on illegal cuttingEducating the community about the importance of acacia trees
34-44	University qualification	Hail city	Male	1	1	4	3	4	4	3	3	5	5	5	5	4	4	1	5	5		40	Imposing strict laws on illegal cuttingOrganizing grazingExpansion of protected areas
more than 45	University qualification	A governorate of Hail	Male	2	2	3	2	3	3	2	2	5	4	5	1	5	5	5	5	5		90	Imposing strict laws on illegal cuttingOrganizing grazingExpansion of protected areas
more than 45	Diploma qualification	Hail city	Male	3	3	3	2	4	3	4	3	4	4	4	4	4	4	3	4	4		40	Imposing strict laws on illegal cuttingOrganizing grazingExpansion of protected areasConfronting desertification through government programs
23-33	High school qualification	Villages from the villages of Hail	Male	5	4	5	5	4	5	4	4	5	5	4	4	4	3	3	5	4		50	Imposing strict laws on illegal cutting
34-44	University qualification	Hail city	Female	4	5	5	4	5	4	3	2	5	5	5	5	5	3	2	3	4		60	Imposing strict laws on illegal cuttingEducating the community about the importance of acacia treesConfronting desertification through government programs
34-44	University qualification	Hail city	Male	3	3	3	3	5	2	1	2	5	4	1	1	5	4	5	5	5		33	Planting more acacia trees
more than 45	University qualification	Villages from the villages of Hail	Female	2	3	3	4	2	2	2	2	4	4	4	2	3	2	2	2	2		45	Imposing strict laws on illegal cuttingEducating the community about the importance of acacia trees
more than 45	University qualification	Hail city	Male	3	3	4	3	3	2	2	3	4	4	4	4	3	3	3	2	2		40	Imposing strict laws on illegal cutting
23-33	University qualification	Hail city	Male	3	2	5	3	4	4	2	2	5	5	5	5	5	3	3	3	2		8	Imposing strict laws on illegal cuttingPlanting more acacia treesEducating the community about the importance of acacia trees
34-44	University qualification	Hail city	Female	5	5	5	5	5	3	4	3	3	3	4	3	3	3	3	3	3		55	Improving irrigation techniques;Imposing strict laws on illegal cuttingOrganizing grazingExpansion of protected areasConfronting desertification through government programs
34-44	Postgraduate qualification	Villages from the villages of Hail	Male	4	3	4	3	3	3	3	3	3	3	3	3	3	3	3	3	3		90	Improving irrigation techniques;Imposing strict laws on illegal cuttingOrganizing grazingExpansion of protected areasConfronting desertification through government programs
34-44	University qualification	Hail city	Male	5	4	5	3	2	1	2	2	5	5	3	3	3	2	2	4	1		60	Planting more acacia trees
23-33	University qualification	Hail city	Male	4	4	5	3	3	5	4	3	4	4	3	2	4	4	5	5	3		28	Imposing strict laws on illegal cuttingEducating the community about the importance of acacia treesConfronting desertification through government programs
34-44	Diploma qualification	A governorate of Hail	Male	5	5	5	5	5	5	5	5	5	5	5	5	5	5	5	5	5		92	Improving irrigation techniques;
23-33	University qualification	A governorate of Hail	Male	3	1	4	3	5	3	5	4	5	4	5	5	1	1	3	3	4		50	Confronting desertification through government programs
34-44	High school qualification	A governorate of Hail	Male	3	3	3	3	4	3	3	3	5	5	3	3	3	3	3	5	3		90	Imposing strict laws on illegal cutting
34-44	University qualification	A governorate of Hail	Male	4	4	5	5	5	4	4	3	5	5	5	5	5	4	4	4	5		60	Imposing strict laws on illegal cutting
more than 45	University qualification	A governorate of Hail	Male	5	5	5	5	5	5	1	1	5	5	5	5	5	5	5	5	5		90	Imposing strict laws on illegal cuttingPlanting more acacia treesEducating the community about the importance of acacia trees
more than 45	High school qualification	Villages from the villages of Hail	Male	1	1	5	2	2	2	3	2	5	5	5	5	2	2	1	3	2		10	Imposing strict laws on illegal cuttingConfronting desertification through government programs
more than 45	University qualification	Hail city	Male	3	3	3	2	3	1	2	2	4	4	2	2	3	3	3	4	3		40	Imposing strict laws on illegal cuttingOrganizing grazingEducating the community about the importance of acacia treesConfronting desertification through government programsPlanting more acacia trees
more than 45	Postgraduate qualification	Hail city	Male	3	3	3	3	3	2	2	2	5	5	5	5	5	5	5	5	5		80	Imposing strict laws on illegal cuttingExpansion of protected areasConfronting desertification through government programs
23-33	University qualification	Hail city	Female	5	5	5	5	5	5	5	5	5	5	5	5	5	5	5	5	5		100	Improving irrigation techniques;
18-22	University qualification	Hail city	Female	3	4	2	3	3	4	3	3	5	3	4	3	3	4	1	1	5		30	Improving irrigation techniques;Imposing strict laws on illegal cuttingPlanting more acacia treesExpansion of protected areas
more than 45	Diploma qualification	Villages from the villages of Hail	Male	2	3	4	4	5	2	3	2	4	3	4	2	3	3	5	4	3		55	Expansion of protected areas
18-22	University qualification	Hail city	Female	4	4	2	3	4	4	4	4	4	4	4	4	3	4	4	4	4		75	Improving irrigation techniques;Expansion of protected areasConfronting desertification through government programs
more than 45	Diploma qualification	Hail city	Male	5	5	5	1	2	2	2	2	5	3	2	2	2	3	3	3	4		50	Imposing strict laws on illegal cuttingOrganizing grazingEducating the community about the importance of acacia treesConfronting desertification through government programs
more than 45	High school qualification	A governorate of Hail	Male	5	2	5	5	5	5	2	2	5	5	5	5	5	5	2	5	5		90	Imposing strict laws on illegal cuttingPlanting more acacia trees
more than 45	University qualification	Hail city	Male	5	3	3	3	3	1	4	3	4	5	3	2	1	5	3	3	4		30	Imposing strict laws on illegal cuttingOrganizing grazingEducating the community about the importance of acacia trees
more than 45	University qualification	Hail city	Male	3	3	4	4	4	3	4	3	5	5	5	5	5	5	3	3	3		40	Imposing strict laws on illegal cuttingPlanting more acacia treesEducating the community about the importance of acacia trees
more than 45	University qualification	Hail city	Male	4	4	5	4	5	3	3	3	5	4	5	5	4	5	2	2	3		50	Educating the community about the importance of acacia trees
more than 45	Diploma qualification	Hail city	Male	4	4	3	4	3	3	3	2	3	3	3	3	3	3	3	3	3		40	Educating the community about the importance of acacia trees
more than 45	Diploma qualification	Hail city	Male	4	4	5	3	4	4	2	2	5	5	5	5	2	2	3	3	3		30	Imposing strict laws on illegal cuttingOrganizing grazingExpansion of protected areasConfronting desertification through government programs
more than 45	University qualification	Hail city	Male	4	4	4	4	3	2	3	2	5	5	4	4	3	3	1	3	3		40	Improving irrigation techniques;Imposing strict laws on illegal cuttingOrganizing grazingExpansion of protected areas
more than 45	University qualification	Hail city	Male	5	5	5	5	5	2	3	2	5	5	5	5	5	5	5	5	5		90	Imposing strict laws on illegal cuttingOrganizing grazingExpansion of protected areasConfronting desertification through government programs
34-44	Diploma qualification	Hail city	Male	5	5	5	5	5	5	4	3	5	5	4	3	5	5	5	5	5		85	Imposing strict laws on illegal cuttingExpansion of protected areasEducating the community about the importance of acacia trees
more than 45	University qualification	Hail city	Male	5	5	5	5	5	1	5	3	5	5	5	5	5	5	3	5	2		70	Imposing strict laws on illegal cuttingExpansion of protected areasConfronting desertification through government programsOrganizing grazing
34-44	Postgraduate qualification	Hail city	Male	5	5	4	4	5	3	5	5	5	5	5	4	5	5	5	5	5		50	Imposing strict laws on illegal cuttingEducating the community about the importance of acacia trees
more than 45	University qualification	Hail city	Male	2	3	3	3	3	1	4	4	5	5	1	1	3	2	5	5	5		35	Imposing strict laws on illegal cuttingEducating the community about the importance of acacia treesConfronting desertification through government programs
more than 45	University qualification	Hail city	Male	2	2	2	1	2	2	1	2	5	2	5	4	4	4	4	4	4		30	Imposing strict laws on illegal cuttingPlanting more acacia treesEducating the community about the importance of acacia trees
more than 45	Diploma qualification	Hail city	Male	1	1	1	1	1	1	1	1	5	5	5	5	5	5	5	5	5		60	Improving irrigation techniques;Confronting desertification through government programsEducating the community about the importance of acacia treesPlanting more acacia treesExpansion of protected areasOrganizing grazingImposing strict laws on illegal cutting
34-44	Postgraduate qualification	A governorate of Hail	Male	3	4	4	4	4	5	4	3	5	5	5	3	3	5	4	5	5		65	Imposing strict laws on illegal cuttingOrganizing grazingExpansion of protected areas
more than 45	Diploma qualification	Hail city	Male	3	3	3	3	3	4	3	2	5	5	5	3	5	5	5	5	5		40	Imposing strict laws on illegal cuttingEducating the community about the importance of acacia treesOrganizing grazing
23-33	University qualification	Hail city	Male	5	5	5	3	5	3	4	4	5	5	5	5	5	3	4	4	4		40	Organizing grazingImposing strict laws on illegal cuttingConfronting desertification through government programs
23-33	University qualification	Hail city	Female	4	4	4	4	4	4	4	4	4	4	4	4	4	4	4	4	4		75	Improving irrigation techniques;Imposing strict laws on illegal cuttingOrganizing grazingExpansion of protected areasConfronting desertification through government programs
23-33	Postgraduate qualification	Hail city	Male	4	4	4	4	4	3	3	4	4	3	3	2	4	3	4	4	3		70	Expansion of protected areas
23-33	Postgraduate qualification	Hail city	Female	3	3	5	5	5	5	5	5	5	5	5	5	5	5	5	5	5		50	Organizing grazingConfronting desertification through government programs
more than 45	Postgraduate qualification	Villages from the villages of Hail	Male	1	1	2	5	5	3	3	4	5	5	5	5	5	5	1	5	5		30	Expansion of protected areas
34-44	Postgraduate qualification	Hail city	Male	5	5	5	3	3	1	4	2	5	5	5	5	1	2	2	5	3		90	Improving irrigation techniques;Imposing strict laws on illegal cuttingOrganizing grazingExpansion of protected areasEducating the community about the importance of acacia treesConfronting desertification through government programs
more than 45	Postgraduate qualification	Villages from the villages of Hail	Male	4	4	3	2	4	3	3	4	5	4	5	5	5	4	4	5	3		60	Imposing strict laws on illegal cuttingEducating the community about the importance of acacia trees
more than 45	Diploma qualification	Villages from the villages of Hail	Male	4	2	4	3	5	2	2	2	4	5	4	4	3	4	3	3	2		30	Organizing grazingConfronting desertification through government programsEducating the community about the importance of acacia treesImposing strict laws on illegal cutting
23-33	University qualification	Villages from the villages of Hail	Male	4	3	2	3	2	1	2	1	5	3	1	1	1	1	1	1	3		60	Imposing strict laws on illegal cuttingOrganizing grazingExpansion of protected areas
34-44	University qualification	Villages from the villages of Hail	Male	3	3	3	3	3	3	3	3	5	5	4	3	4	4	4	4	3		70	Organizing grazingEducating the community about the importance of acacia treesExpansion of protected areas
more than 45	University qualification	Villages from the villages of Hail	Male	4	3	3	2	2	2	2	2	3	4	2	2	3	2	3	2	3		30	Organizing grazingEducating the community about the importance of acacia treesPlanting more acacia trees
23-33	University qualification	Villages from the villages of Hail	Male	4	3	5	3	3	5	3	1	5	5	5	4	4	5	3	3	3		40	Imposing strict laws on illegal cuttingOrganizing grazingExpansion of protected areas
34-44	University qualification	Hail city	Male	5	5	5	4	3	3	1	1	5	5	5	5	5	5	5	5	5		0	Improving irrigation techniques;Imposing strict laws on illegal cuttingOrganizing grazingExpansion of protected areasConfronting desertification through government programs
more than 45	Postgraduate qualification	A governorate of Hail	Male	5	3	4	3	5	5	4	3	5	5	5	3	5	5	5	4	3		75	Imposing strict laws on illegal cuttingOrganizing grazingConfronting desertification through government programs
34-44	Postgraduate qualification	A governorate of Hail	Male	3	3	3	3	3	1	1	1	5	5	2	2	2	1	2	5	4		50	Organizing grazingExpansion of protected areasImproving irrigation techniques;Imposing strict laws on illegal cuttingEducating the community about the importance of acacia treesConfronting desertification through government programs
34-44	High school qualification	Hail city	Male	1	3	2	1	1	2	3	4	5	4	3	1	1	2	1	1	3		11	Planting more acacia trees
23-33	University qualification	Hail city	Male	3	3	4	3	4	4	3	2	3	5	3	3	2	4	3	3	4		65	Imposing strict laws on illegal cuttingExpansion of protected areasOrganizing grazing
more than 45	University qualification	Hail city	Male	5	5	5	5	5	5	5	5	5	5	5	5	5	5	5	5	5		100	Improving irrigation techniques;
34-44	University qualification	Hail city	Male	4	5	5	3	5	5	1	5	5	5	5	5	5	5	5	5	5		60	Expansion of protected areas
34-44	Postgraduate qualification	A governorate of Hail	Female	4	4	4	4	4	4	4	4	4	4	5	4	5	5	5	5	5		50	Imposing strict laws on illegal cuttingImproving irrigation techniques;Expansion of protected areasOrganizing grazing
more than 45	University qualification	Hail city	Male	3	3	4	3	3	3	3	3	5	4	3	3	3	3	3	4	4		80	Imposing strict laws on illegal cuttingPlanting more acacia treesEducating the community about the importance of acacia trees
more than 45	High school qualification	Hail city	Male	3	3	4	3	3	3	3	3	4	4	4	3	4	4	4	3	3		70	Improving irrigation techniques;Organizing grazingEducating the community about the importance of acacia trees
34-44	Postgraduate qualification	A governorate of Hail	Male	3	3	2	2	2	2	2	2	5	3	2	3	3	3	1	2	1		10	Educating the community about the importance of acacia treesImproving irrigation techniques;Expansion of protected areas
34-44	University qualification	Hail city	Male	3	3	4	3	3	4	4	4	3	4	4	4	4	4	4	3	3		50	Organizing grazingExpansion of protected areas
34-44	Postgraduate qualification	Hail city	Male	4	2	1	1	1	3	1	1	5	3	2	2	2	2	2	2	2		100	Educating the community about the importance of acacia treesPlanting more acacia treesImposing strict laws on illegal cutting
more than 45	High school qualification	Hail city	Male	4	4	4	4	3	2	1	4	5	5	5	5	5	5	5	5	4		80	Improving irrigation techniques;Expansion of protected areasPlanting more acacia trees
34-44	Postgraduate qualification	Hail city	Male	5	2	5	3	1	1	2	1	5	5	5	3	5	5	1	5	4		40	Improving irrigation techniques;Imposing strict laws on illegal cuttingPlanting more acacia trees
34-44	High school qualification	Villages from the villages of Hail	Male	5	5	5	5	5	5	5	5	5	5	5	5	5	5	5	5	5		50	Imposing strict laws on illegal cuttingOrganizing grazingImproving irrigation techniques;Expansion of protected areasConfronting desertification through government programs
more than 45	University qualification	Hail city	Male	5	5	5	5	4	4	3	4	5	4	5	5	4	5	4	4	5		40	Improving irrigation techniques;Imposing strict laws on illegal cuttingEducating the community about the importance of acacia treesConfronting desertification through government programs
34-44	Diploma qualification	Hail city	Male	5	3	4	3	3	2	2	2	5	5	4	2	3	3	3	3	4		70	Imposing strict laws on illegal cutting
more than 45	University qualification	Hail city	Male	4	1	2	2	2	3	2	2	5	4	5	4	5	5	3	4	2		60	Imposing strict laws on illegal cuttingOrganizing grazingExpansion of protected areas
34-44	Postgraduate qualification	Hail city	Male	3	3	3	3	3	3	3	3	5	5	5	3	3	5	3	3	3		50	Organizing grazingPlanting more acacia treesEducating the community about the importance of acacia trees
34-44	University qualification	Hail city	Male	5	2	2	1	1	1	1	1	3	4	4	4	4	4	3	4	2		20	Imposing strict laws on illegal cutting
more than 45	High school qualification	A governorate of Hail	Female	5	5	5	5	5	5	5	5	5	5	5	5	5	5	5	5	5		100	Imposing strict laws on illegal cutting
more than 45	Postgraduate qualification	Hail city	Male	4	3	4	4	4	3	3	4	4	4	4	3	3	4	3	3	3		0	Organizing grazingPlanting more acacia treesEducating the community about the importance of acacia trees
34-44	Postgraduate qualification	Hail city	Male	5	5	5	4	4	4	3	5	5	5	5	5	5	5	4	4	5		60	Improving irrigation techniques;Imposing strict laws on illegal cuttingOrganizing grazingExpansion of protected areasConfronting desertification through government programs
23-33	University qualification	Villages from the villages of Hail	Male	3	2	3	2	3	4	3	3	5	5	5	4	4	4	4	5	3		0	Expansion of protected areas
34-44	University qualification	A governorate of Hail	Male	1	1	1	1	1	1	1	1	5	2	2	2	2	2	2	2	1		30	Imposing strict laws on illegal cuttingPlanting more acacia treesConfronting desertification through government programs
34-44	University qualification	Hail city	Male	5	4	5	5	4	5	5	5	4	5	5	3	2	3	3	1	3		60	Imposing strict laws on illegal cuttingImproving irrigation techniques;Planting more acacia trees
23-33	Postgraduate qualification	Hail city	Male	5	4	4	4	4	4	4	4	5	4	5	5	5	5	5	4	4		100	Improving irrigation techniques;Imposing strict laws on illegal cuttingExpansion of protected areasEducating the community about the importance of acacia treesConfronting desertification through government programs
more than 45	High school qualification	Hail city	Male	3	3	4	3	4	4	3	3	5	4	4	4	3	4	4	4	3		40	Organizing grazingImposing strict laws on illegal cuttingPlanting more acacia treesEducating the community about the importance of acacia trees
18-22	University qualification	A governorate of Hail	Male	5	4	5	3	4	5	5	5	5	4	4	3	5	3	5	4	5		50	Educating the community about the importance of acacia treesOrganizing grazingImproving irrigation techniques;Imposing strict laws on illegal cuttingExpansion of protected areas
more than 45	University qualification	Hail city	Male	3	5	5	2	2	1	2	3	5	3	3	3	2	3	2	4	3		20	Imposing strict laws on illegal cuttingConfronting desertification through government programsPlanting more acacia trees
more than 45	University qualification	Hail city	Male	5	3	4	2	1	1	2	3	5	5	4	3	2	2	2	3	2		20	Educating the community about the importance of acacia treesPlanting more acacia treesImposing strict laws on illegal cutting
34-44	University qualification	Hail city	Male	5	5	5	5	5	5	5	5	5	5	5	5	5	5	5	5	5		80	Imposing strict laws on illegal cutting
more than 45	Postgraduate qualification	Hail city	Male	5	5	4	4	5	5	5	5	5	5	5	4	4	4	4	4	4		40	Imposing strict laws on illegal cuttingPlanting more acacia treesEducating the community about the importance of acacia treesConfronting desertification through government programsExpansion of protected areas
more than 45	Postgraduate qualification	A governorate of Hail	Male	2	3	3	3	3	3	3	3	4	3	3	3	3	3	2	3	3		80	Improving irrigation techniques;Imposing strict laws on illegal cuttingOrganizing grazingExpansion of protected areasConfronting desertification through government programs
more than 45	Postgraduate qualification	Hail city	Male	5	3	3	2	3	2	1	1	5	4	5	5	5	5	4	3	1		60	Imposing strict laws on illegal cuttingPlanting more acacia treesEducating the community about the importance of acacia trees
more than 45	University qualification	Hail city	Female	5	5	5	4	4	4	5	4	5	5	5	5	4	4	4	4	5		70	Confronting desertification through government programs
34-44	High school qualification	A governorate of Hail	Male	5	5	5	4	4	2	4	4	5	5	5	5	5	5	5	5	5		90	Improving irrigation techniques;Imposing strict laws on illegal cuttingOrganizing grazingExpansion of protected areasConfronting desertification through government programs
34-44	University qualification	Hail city	Female	4	4	4	4	4	5	3	3	5	5	3	1	3	2	4	4	4		60	Imposing strict laws on illegal cuttingPlanting more acacia treesEducating the community about the importance of acacia trees
more than 45	Postgraduate qualification	Hail city	Male	4	4	3	3	3	4	4	3	5	4	5	3	5	4	3	4	3		40	Imposing strict laws on illegal cuttingEducating the community about the importance of acacia treesPlanting more acacia trees
23-33	University qualification	Villages from the villages of Hail	Male	3	3	5	5	5	5	3	2	5	3	5	5	5	5	5	5	5		70	Imposing strict laws on illegal cutting
34-44	Diploma qualification	Hail city	Male	5	5	5	5	5	5	5	5	5	5	5	5	5	5	5	5	5		65	Improving irrigation techniques;
34-44	Postgraduate qualification	Hail city	Male	2	2	4	1	3	3	1	1	4	4	3	3	2	3	3	5	2		50	Imposing strict laws on illegal cuttingPlanting more acacia treesConfronting desertification through government programs
more than 45	Diploma qualification	Hail city	Male	3	3	3	3	3	4	2	1	5	4	3	3	2	3	2	3	2		50	Imposing strict laws on illegal cutting
more than 45	Postgraduate qualification	Hail city	Female	3	3	3	5	5	5	3	3	5	5	5	5	5	5	5	5	5		60	Imposing strict laws on illegal cuttingEducating the community about the importance of acacia treesConfronting desertification through government programs
more than 45	Postgraduate qualification	Hail city	Male	4	4	4	4	4	4	4	4	4	4	5	5	5	5	4	5	4		70	Improving irrigation techniques;Imposing strict laws on illegal cutting
23-33	University qualification	Hail city	Male	5	4	4	4	2	4	2	2	5	4	3	4	3	4	4	3	2		50	Organizing grazingPlanting more acacia treesEducating the community about the importance of acacia trees
18-22	University qualification	Hail city	Female	4	4	4	5	5	4	5	5	5	5	3	2	4	5	5	2	4		70	Planting more acacia treesOrganizing grazingImproving irrigation techniques;
more than 45	Postgraduate qualification	Hail city	Male	4	3	3	2	2	3	2	3	4	4	4	4	4	4	4	5	4		40	Improving irrigation techniques;Imposing strict laws on illegal cuttingOrganizing grazingExpansion of protected areasConfronting desertification through government programs
more than 45	High school qualification	A governorate of Hail	Male	5	1	2	1	4	5	1	2	5	2	5	4	5	4	4	3	2		70	Imposing strict laws on illegal cuttingPlanting more acacia treesConfronting desertification through government programs
more than 45	High school qualification	A governorate of Hail	Male	3	3	4	3	3	3	3	3	5	5	5	5	5	5	5	5	5		70	Imposing strict laws on illegal cuttingExpansion of protected areas
more than 45	High school qualification	Hail city	Male	4	3	4	2	2	1	2	3	5	3	5	5	5	4	3	3	3		30	Educating the community about the importance of acacia treesImposing strict laws on illegal cuttingExpansion of protected areas
more than 45	University qualification	A governorate of Hail	Male	5	4	4	4	4	3	3	3	5	5	3	3	4	3	3	4	3		50	Organizing grazingPlanting more acacia treesEducating the community about the importance of acacia treesConfronting desertification through government programs
more than 45	Postgraduate qualification	Villages from the villages of Hail	Male	4	3	5	4	4	3	3	3	5	5	3	4	4	4	3	3	4		65	Imposing strict laws on illegal cuttingPlanting more acacia treesEducating the community about the importance of acacia treesOrganizing grazing
34-44	Postgraduate qualification	Hail city	Female	2	2	4	3	3	1	2	2	5	5	5	4	3	3	5	4	4		15	Imposing strict laws on illegal cuttingOrganizing grazingEducating the community about the importance of acacia trees
more than 45	Diploma qualification	A governorate of Hail	Male	4	3	3	2	2	2	2	2	5	5	4	4	3	3	3	3	3		30	Imposing strict laws on illegal cuttingEducating the community about the importance of acacia treesOrganizing grazingExpansion of protected areas
34-44	Postgraduate qualification	A governorate of Hail	Male	2	2	2	2	5	3	2	2	5	5	5	5	5	5	5	2	2		50	Imposing strict laws on illegal cuttingOrganizing grazingExpansion of protected areasConfronting desertification through government programs
34-44	University qualification	Hail city	Female	4	4	4	3	3	4	4	4	4	4	4	4	4	4	4	4	4		60	Organizing grazingExpansion of protected areas
34-44	University qualification	Hail city	Male	2	2	3	3	3	3	3	2	5	3	3	2	2	3	3	3	3		40	Imposing strict laws on illegal cuttingPlanting more acacia treesEducating the community about the importance of acacia trees
34-44	Diploma qualification	Hail city	Male	3	5	4	5	3	5	2	3	5	5	4	4	5	5	4	3	4		90	Imposing strict laws on illegal cuttingEducating the community about the importance of acacia treesPlanting more acacia trees
34-44	Postgraduate qualification	Hail city	Male	4	3	3	5	4	5	2	3	5	5	5	3	3	2	2	5	3		90	Improving irrigation techniques;Imposing strict laws on illegal cuttingPlanting more acacia trees
more than 45	Postgraduate qualification	Villages from the villages of Hail	Male	5	4	4	4	4	4	4	3	4	4	4	3	4	4	4	4	4		60	Imposing strict laws on illegal cutting
34-44	University qualification	Villages from the villages of Hail	Male	4	4	3	2	3	3	2	3	5	4	3	4	4	3	3	3	3		40	Educating the community about the importance of acacia trees
34-44	Postgraduate qualification	A governorate of Hail	Male	3	2	4	3	3	3	3	2	5	5	4	4	4	4	5	5	3		50	Imposing strict laws on illegal cuttingPlanting more acacia treesEducating the community about the importance of acacia treesConfronting desertification through government programsOrganizing grazingExpansion of protected areasImproving irrigation techniques;
34-44	Postgraduate qualification	Villages from the villages of Hail	Male	3	2	4	3	3	1	3	3	4	4	4	4	2	2	3	3	3		50	Imposing strict laws on illegal cuttingPlanting more acacia treesEducating the community about the importance of acacia trees
23-33	Postgraduate qualification	Villages from the villages of Hail	Male	4	5	4	4	3	2	2	4	5	4	4	2	3	2	2	1	3		65	Imposing strict laws on illegal cutting
more than 45	University qualification	Hail city	Female	5	5	5	5	5	5	4	4	5	4	5	3	4	4	3	2	3		50	Improving irrigation techniques;Imposing strict laws on illegal cuttingOrganizing grazingExpansion of protected areasConfronting desertification through government programs
23-33	University qualification	Hail city	Male	5	2	4	3	3	5	2	4	5	2	4	3	3	4	3	4	5		70	Educating the community about the importance of acacia trees
23-33	Postgraduate qualification	Hail city	Male	3	3	3	3	3	3	3	4	5	5	5	3	3	3	4	3	4		50	Improving irrigation techniques;Imposing strict laws on illegal cuttingExpansion of protected areasEducating the community about the importance of acacia trees
34-44	Diploma qualification	Hail city	Male	4	2	5	2	3	3	2	1	5	3	1	1	2	2	1	1	1		65	Educating the community about the importance of acacia trees
more than 45	High school qualification	Villages from the villages of Hail	Male	5	5	5	5	5	3	3	4	5	4	4	5	5	5	5	4	4		85	Expansion of protected areas
23-33	Diploma qualification	A governorate of Hail	Male	5	1	3	5	4	5	3	3	5	5	5	5	5	5	5	5	5		100	Planting more acacia treesExpansion of protected areasEducating the community about the importance of acacia trees
34-44	Postgraduate qualification	Hail city	Male	5	3	5	5	4	5	4	4	4	4	2	3	4	4	4	3	3		50	Imposing strict laws on illegal cutting
34-44	Postgraduate qualification	Hail city	Female	5	4	3	4	5	5	4	5	5	4	4	2	4	3	2	3	4		50	Imposing strict laws on illegal cuttingImproving irrigation techniques;Organizing grazingExpansion of protected areas
more than 45	Postgraduate qualification	Hail city	Male	5	5	5	5	5	1	5	5	5	3	3	3	3	2	5	3	5		90	Improving irrigation techniques;Imposing strict laws on illegal cuttingEducating the community about the importance of acacia trees
more than 45	University qualification	Hail city	Male	5	5	5	3	3	2	4	3	5	4	4	5	1	2	5	4	3		70	Improving irrigation techniques;Educating the community about the importance of acacia treesConfronting desertification through government programsPlanting more acacia trees
more than 45	University qualification	Hail city	Male	5	5	4	2	2	1	2	2	4	3	3	2	2	2	2	3	2		40	Imposing strict laws on illegal cuttingPlanting more acacia treesEducating the community about the importance of acacia trees
23-33	Postgraduate qualification	Villages from the villages of Hail	Male	4	5	3	5	4	4	4	2	2	5	3	5	5	3	3	2	4		40	Improving irrigation techniques;Expansion of protected areasOrganizing grazing
more than 45	University qualification	Hail city	Male	2	2	3	1	1	1	2	1	5	4	2	2	1	2	3	2	2		70	Imposing strict laws on illegal cuttingPlanting more acacia treesEducating the community about the importance of acacia treesExpansion of protected areas
34-44	Diploma qualification	A governorate of Hail	Male	3	5	5	5	5	5	3	3	5	5	5	5	5	5	5	5	5		50	Planting more acacia trees
23-33	University qualification	A governorate of Hail	Male	4	2	5	2	4	4	3	2	5	4	5	5	4	3	4	4	4		60	Imposing strict laws on illegal cuttingOrganizing grazingImproving irrigation techniques;Expansion of protected areasConfronting desertification through government programs
34-44	High school qualification	A governorate of Hail	Male	3	3	5	4	3	3	4	3	5	5	2	5	4	4	4	4	5		70	Organizing grazingImposing strict laws on illegal cuttingEducating the community about the importance of acacia trees
34-44	University qualification	A governorate of Hail	Male	3	2	3	3	4	2	2	2	5	5	5	5	5	5	3	5	5		50	Planting more acacia treesImposing strict laws on illegal cuttingEducating the community about the importance of acacia treesImproving irrigation techniques;
more than 45	University qualification	A governorate of Hail	Male	2	2	4	2	3	5	3	2	4	5	2	2	3	5	3	5	2		30	Improving irrigation techniques;
more than 45	High school qualification	Villages from the villages of Hail	Male	5	1	4	1	3	5	4	3	5	5	4	3	4	4	4	3	3		0	Imposing strict laws on illegal cuttingEducating the community about the importance of acacia treesExpansion of protected areasOrganizing grazing
more than 45	University qualification	Hail city	Male	5	4	5	2	3	3	2	2	5	2	3	3	4	3	2	3	3		15	Educating the community about the importance of acacia treesPlanting more acacia treesImposing strict laws on illegal cutting
more than 45	Postgraduate qualification	Hail city	Male	4	3	5	1	2	4	3	5	5	5	5	2	5	5	2	5	5		30	Improving irrigation techniques;Imposing strict laws on illegal cuttingOrganizing grazingExpansion of protected areasConfronting desertification through government programs
23-33	University qualification	Hail city	Female	4	4	4	4	4	4	4	4	5	1	5	4	5	5	5	4	4		55	Improving irrigation techniques;Planting more acacia treesEducating the community about the importance of acacia treesConfronting desertification through government programs
18-22	University qualification	Hail city	Female	4	4	3	1	2	4	2	5	5	5	5	5	5	5	5	5	5		60	Imposing strict laws on illegal cuttingEducating the community about the importance of acacia trees
more than 45	Diploma qualification	Villages from the villages of Hail	Male	5	4	4	3	3	1	1	2	2	2	2	3	1	2	2	2	2		70	Imposing strict laws on illegal cuttingOrganizing grazingExpansion of protected areasEducating the community about the importance of acacia trees
18-22	University qualification	Hail city	Female	3	3	3	1	2	2	1	1	5	4	5	3	1	3	2	1	2		43	Educating the community about the importance of acacia treesExpansion of protected areasOrganizing grazing
more than 45	Diploma qualification	Hail city	Male	3	3	4	2	4	5	3	4	4	4	4	3	5	5	4	4	4		0	Improving irrigation techniques;Planting more acacia treesExpansion of protected areas
more than 45	High school qualification	A governorate of Hail	Male	5	4	5	5	5	5	1	3	5	5	5	5	5	5	5	5	5		55	Planting more acacia treesConfronting desertification through government programsImposing strict laws on illegal cutting
more than 45	University qualification	Hail city	Male	4	4	3	2	3	1	3	5	3	1	1	1	3	3	5	3	2		10	Imposing strict laws on illegal cutting
more than 45	University qualification	Hail city	Male	5	4	5	4	3	1	3	4	4	5	5	4	5	4	5	5	5		70	Improving irrigation techniques;Imposing strict laws on illegal cuttingOrganizing grazingExpansion of protected areasConfronting desertification through government programs
more than 45	University qualification	Hail city	Male	2	3	4	2	3	4	4	3	3	4	3	2	4	3	3	4	4		70	Imposing strict laws on illegal cuttingOrganizing grazingExpansion of protected areas
more than 45	Diploma qualification	Hail city	Male	5	5	5	3	4	3	3	2	5	4	4	5	5	4	5	5	5		40	Improving irrigation techniques;Imposing strict laws on illegal cutting
more than 45	Diploma qualification	Hail city	Male	3	3	3	3	3	3	3	3	5	5	5	5	5	5	5	5	5		60	Imposing strict laws on illegal cuttingEducating the community about the importance of acacia treesConfronting desertification through government programs
more than 45	University qualification	Hail city	Male	3	4	3	3	3	5	4	4	3	3	4	3	3	3	3	3	4		40	Educating the community about the importance of acacia treesOrganizing grazingImposing strict laws on illegal cutting
more than 45	University qualification	Hail city	Male	4	4	4	4	4	4	4	4	5	5	5	5	5	5	4	4	4		25	Imposing strict laws on illegal cuttingImproving irrigation techniques;Confronting desertification through government programsExpansion of protected areas
34-44	Diploma qualification	Hail city	Male	2	3	5	1	4	1	1	1	4	4	4	2	1	1	1	1	2		70	Expansion of protected areas
more than 45	University qualification	Hail city	Male	4	5	5	3	4	3	4	4	5	5	4	4	4	4	2	3	3		40	Imposing strict laws on illegal cuttingEducating the community about the importance of acacia treesExpansion of protected areas
34-44	Postgraduate qualification	Hail city	Male	3	3	3	3	3	3	2	2	5	4	3	2	2	2	1	1	1		50	Organizing grazingImproving irrigation techniques;Educating the community about the importance of acacia treesConfronting desertification through government programsPlanting more acacia trees
more than 45	University qualification	Hail city	Male	1	3	3	2	4	1	1	1	5	4	4	4	4	4	3	3	3		40	Imposing strict laws on illegal cuttingOrganizing grazingExpansion of protected areas
more than 45	University qualification	Hail city	Male	5	5	5	5	5	4	3	4	5	5	4	3	5	5	5	5	5		70	Imposing strict laws on illegal cuttingExpansion of protected areasEducating the community about the importance of acacia trees
more than 45	Diploma qualification	Hail city	Male	4	4	5	5	5	5	3	2	5	5	5	5	5	5	2	3	2		40	Imposing strict laws on illegal cuttingOrganizing grazing
34-44	Postgraduate qualification	A governorate of Hail	Male	2	2	2	2	2	2	2	1	4	3	5	5	4	4	5	4	4		40	Planting more acacia treesImposing strict laws on illegal cuttingExpansion of protected areasEducating the community about the importance of acacia treesConfronting desertification through government programs
more than 45	Diploma qualification	Hail city	Male	2	1	4	2	2	2	2	2	3	5	2	2	2	2	2	3	2		40	Imposing strict laws on illegal cuttingOrganizing grazingExpansion of protected areas
23-33	University qualification	Hail city	Male	4	4	3	4	2	1	2	2	5	4	3	4	3	3	3	3	2		50	Imposing strict laws on illegal cuttingExpansion of protected areasOrganizing grazing
23-33	University qualification	Hail city	Female	4	4	5	5	5	4	3	3	5	5	5	5	4	4	2	4	4		40	Imposing strict laws on illegal cuttingOrganizing grazingEducating the community about the importance of acacia trees
23-33	Postgraduate qualification	Hail city	Male	4	2	4	3	4	2	1	3	5	4	5	5	5	4	4	4	4		70	Imposing strict laws on illegal cuttingOrganizing grazingEducating the community about the importance of acacia trees
23-33	Postgraduate qualification	Hail city	Female	1	1	3	3	1	1	1	1	5	5	5	2	2	2	5	2	2		20	Imposing strict laws on illegal cutting
more than 45	Postgraduate qualification	Villages from the villages of Hail	Male	5	2	3	4	4	2	2	1	5	5	5	5	5	5	3	5	5		100	Imposing strict laws on illegal cuttingOrganizing grazingExpansion of protected areasConfronting desertification through government programs
34-44	Postgraduate qualification	Hail city	Male	4	4	3	2	5	5	4	5	5	5	5	4	3	2	3	3	3		25	Expansion of protected areasEducating the community about the importance of acacia treesConfronting desertification through government programsOrganizing grazingImposing strict laws on illegal cutting
more than 45	Postgraduate qualification	Villages from the villages of Hail	Male	3	2	2	2	2	1	2	1	3	1	1	1	2	2	1	3	2		20	Educating the community about the importance of acacia treesPlanting more acacia treesExpansion of protected areas
more than 45	Diploma qualification	Villages from the villages of Hail	Male	2	2	2	2	2	1	2	1	4	5	3	1	2	1	3	2	1		70	Imposing strict laws on illegal cuttingOrganizing grazingExpansion of protected areasPlanting more acacia trees
23-33	University qualification	Villages from the villages of Hail	Male	4	3	3	3	3	2	3	1	5	4	4	4	4	4	4	4	3		2	Educating the community about the importance of acacia treesPlanting more acacia treesExpansion of protected areas
34-44	University qualification	Villages from the villages of Hail	Male	3	3	3	3	3	3	2	2	4	4	5	3	3	5	4	5	3		30	Organizing grazingExpansion of protected areasPlanting more acacia trees
more than 45	University qualification	Villages from the villages of Hail	Male	3	3	4	5	3	2	2	2	4	4	4	3	3	3	2	2	2		25	Improving irrigation techniques;Imposing strict laws on illegal cuttingOrganizing grazing
23-33	University qualification	Villages from the villages of Hail	Male	1	2	1	5	5	2	3	3	5	5	5	5	5	5	1	5	3		10	Educating the community about the importance of acacia trees
34-44	University qualification	Hail city	Male	2	2	3	1	1	2	1	1	3	4	2	1	1	1	1	2	1		90	Imposing strict laws on illegal cutting
more than 45	Postgraduate qualification	A governorate of Hail	Male	5	3	1	1	2	1	3	4	5	2	5	2	4	4	4	4	5		50	Imposing strict laws on illegal cuttingPlanting more acacia trees
34-44	Postgraduate qualification	A governorate of Hail	Male	3	3	2	2	2	2	5	2	5	4	5	3	3	3	3	4	2		30	Imposing strict laws on illegal cuttingPlanting more acacia treesEducating the community about the importance of acacia treesConfronting desertification through government programs
34-44	High school qualification	Hail city	Male	3	2	3	2	2	2	2	2	5	5	2	5	3	3	2	4	2		60	Improving irrigation techniques;Imposing strict laws on illegal cuttingPlanting more acacia treesEducating the community about the importance of acacia treesConfronting desertification through government programs
23-33	University qualification	Hail city	Male	5	3	5	3	5	2	4	5	5	5	5	4	3	4	5	3	4		50	Planting more acacia trees
more than 45	University qualification	Hail city	Male	5	4	4	4	4	1	2	1	2	2	4	4	3	2	2	3	2		70	Imposing strict laws on illegal cuttingPlanting more acacia treesEducating the community about the importance of acacia trees
34-44	University qualification	Hail city	Male	3	3	4	5	3	5	3	4	4	2	3	2	3	4	4	4	5		60	Improving irrigation techniques;Imposing strict laws on illegal cuttingPlanting more acacia treesEducating the community about the importance of acacia treesConfronting desertification through government programs
34-44	Postgraduate qualification	A governorate of Hail	Female	5	2	2	2	1	3	3	2	5	3	5	5	5	5	1	1	1		80	Planting more acacia trees
